# Supplementary material for: Synthesis and structure determination from powder data of the first organically templated tin(iv) phosphate : MIL-76 or Sn3IVO2(H2O)(HPO4)4.{H2N–C2H4–NH2}2.5.{H2O}2
Source: Royal Society of Chemistry journal article supplement (doi:10.1039/b304900k), 2003-01-01
Supplement: b304900k.doc [file b304900k.doc]

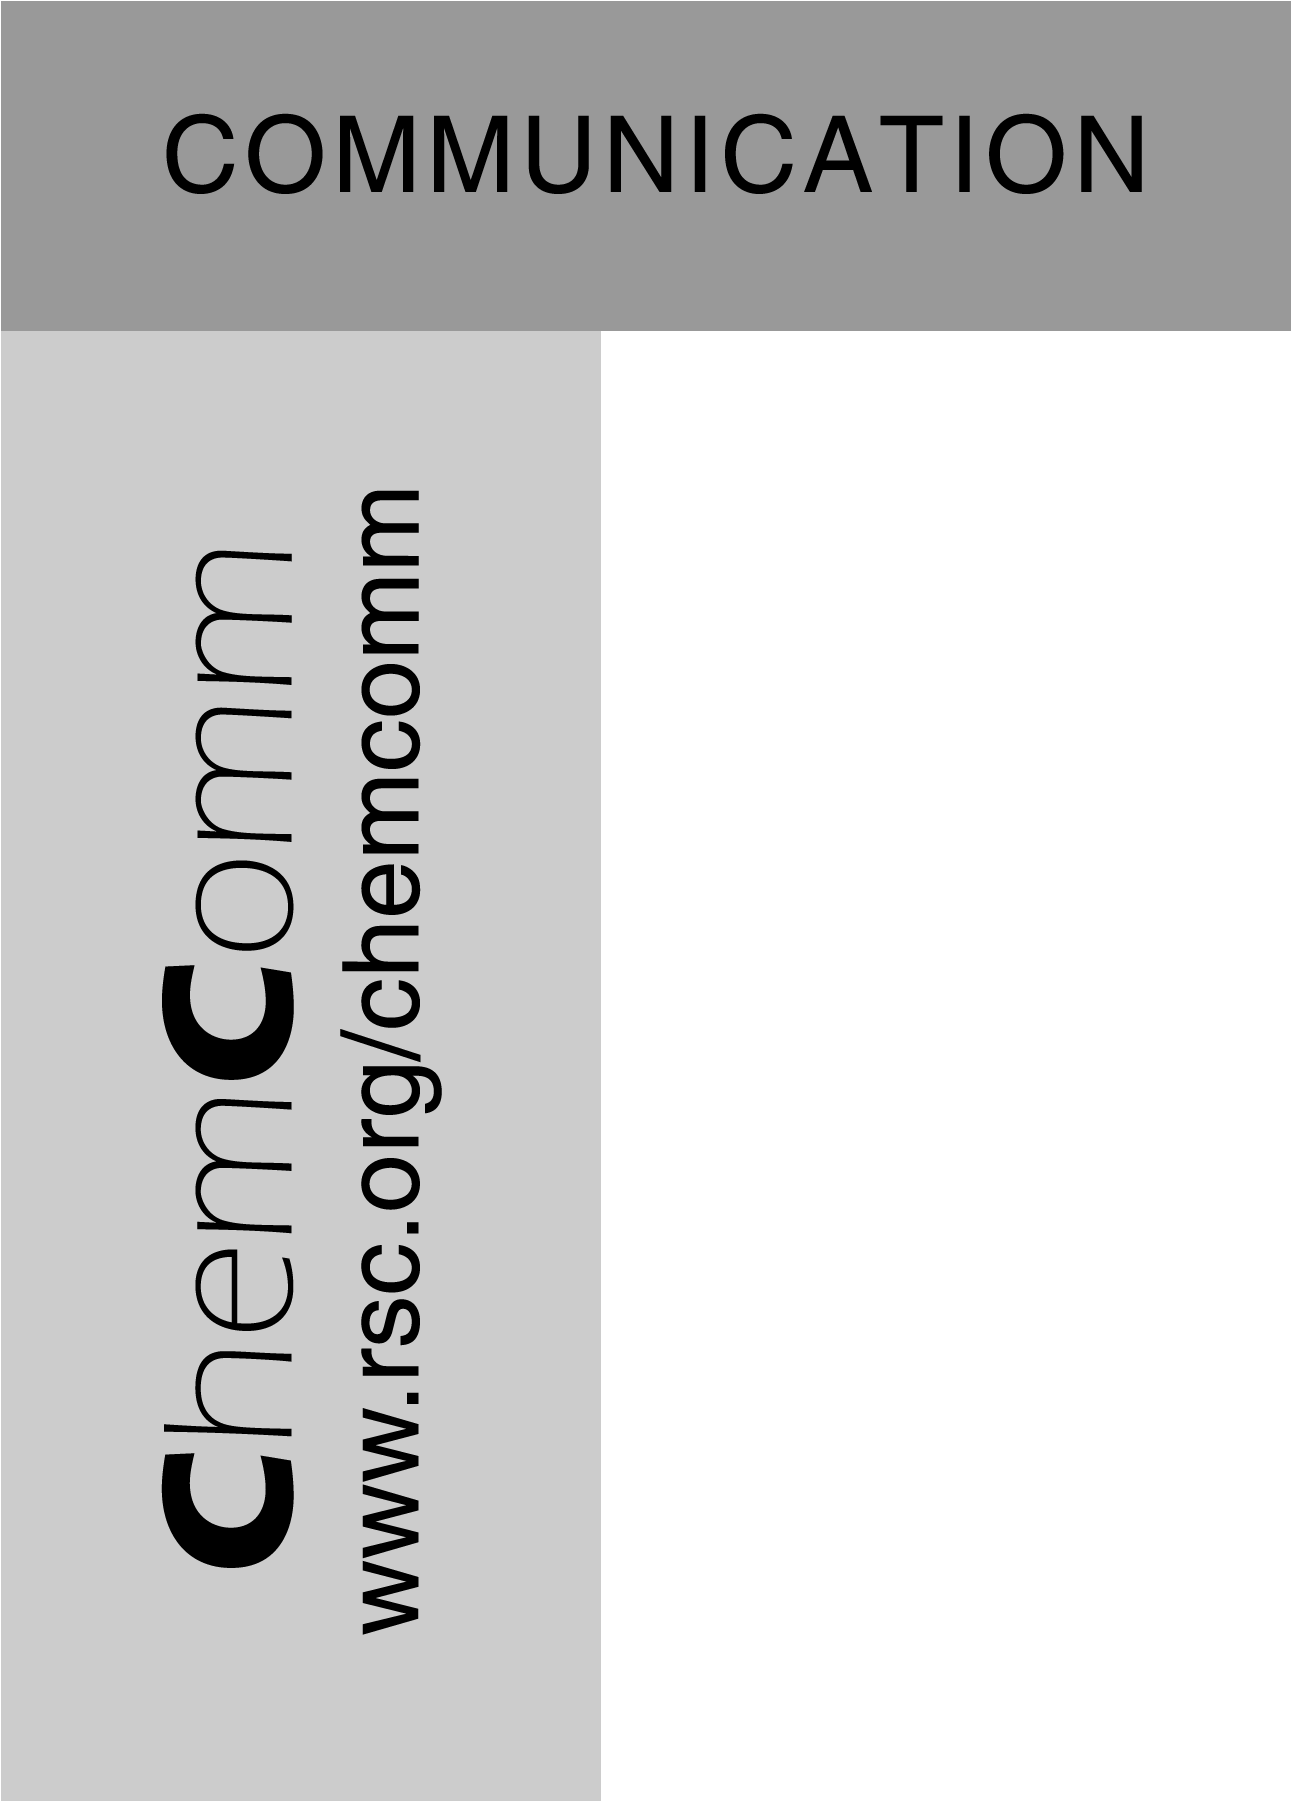
Synthesis and Structure Determination From Powder Data of MIL-76: the First Organically Templated Tin(IV) Phosphate : Sn3IVO2(H2O)(HPO4)4.{H2N-C2H4-NH2}2.5.{H2O}2

# Christian Serrea* and Gérard Féreya*

Institut Lavoisier-Franklin, UFR 2483, Université de Versailles St-Quentin-en-Yvelines, 45 Avenue des Etats-Unis 78035 Versailles Cedex, France; Email: serre@chimie.uvsq.fr, ferey@chimie.uvsq.fr

### Supporting information

**Structure determination.** The powder X-ray diffraction patterns of **MIL-76** was collected on a D5000 (–2 mode) Siemens diffractometer with (Cu K1, K2)= 1.54059, 1.54439 Å.

The pattern of MIL-76 was indexed with the Dicvolgv program and a monoclinic solution with adequate figures of merit (M(20)/F(20)=30/97 (0.0047, 53)) was found with a= 11.152 Å, b= 22.193Å, c= 9.532 Å, = 95.57°, space group P21/c (n°14). To lower the preferred orientation effects, powder of **MIL-76** was mounted in a top-loaded Mac Murdie type alumina sample-holder which led to a reduction of the preferred orientation effect. The pattern matching was performed with Fullprof2k using the Winplotr software package.1,2 A direct method, using Expo, was achieved to solve the structure of **MIL-76**. Tin atoms, some phosphorus and oxygen atoms were found after the direct method while remaining atoms (P, O, N and C) were found using Fourier difference maps with the Shelxtl software. The structure was then refined using Fullprof2k. Best results for the refinement were obtained using experimental point values to adjust the background, a Pseudo-Voigt function to determine the peak profile and two asymmetry parameters. Soft distances constraints, including Sn-O, P-O, N-C and C-C (distances constraints fixed 2, 1.52, 1.45 and 1.5 Å, respectively), angles constraints for the organic template, two thermal parameters (one for tin atoms and another for the P, O, N and C atoms) and a preferred orientation vector were also introduced during the refinement. Details of the structure determination are reported in Table 1 while atomic positions and bond distances are given in Tables 2 and 3.

The formula deduced from the structure determination for **MIL-76** is: Sn3IVO2(H2O)(HPO4)4.{H2N-C2H4-NH2}2.5.{H2O}2. The final agreement factors3 (see Table 1) are very satisfactory, (Rp=6.7%, Rwp=9.3 % and RBragg=6.5 %).

**Table 1 :** Crystal data and structure refinement parameters for **MIL-76.**

| Formula | MIL-76 |
| --- | --- |
| Chemical formula | Sn3P4O21N5C5H20 |
| Molar weight (g.mol-1) | 357.72 |
| Calculated density (g.cm-3) | 2.69 |
| Crystal system | Monoclinic |
| Space group | *P21/c* (n°14) |
| *a* (Å) | 11.152 (1) |
| *b* (Å) | 22.193 (1) |
| *c* (Å) | 9.533 (1) |
| * (°)* | 95.569 (1) |
| *V* (Å3) | 1440.6(1) |
| *Z* | 4 |
| Figures of merit M20/F20 | 30/81 (0.0047, 53) |
| Radiation  (Cu K) | 1.54059, 1.54439 |
| =K2/K1 | 0.4 |
| Temperature (K) | 296 |
| 2** range (°) | 6 - 80 |
| N. reflections | 712 |
| N. independent atoms | 38 |
| N. intensity parameters | 118 |
| N. profile parameters | 12 |
| N. soft distance constraints | 8 |
| *R*P | 8.2 |
| *R*WP | 10.5 |
| *R*Bragg | 6.65 |
| Thermal factors | 1.0 (Sn) and 2.3 (P, O, N, C) |
| Profile function | Pseudo-Voigt |
| Background | Experimental (17 points) |
| N. of asymmetry parameters | 2 |
| Preferred orientation vector | 1 0 0 |

**Table 2:** Atomic coordinates for **MIL-76.**

| Atom | *x/a* | *y/b* | *z/c* |
| --- | --- | --- | --- |
| Sn(1) | 0.697(6) | 0.3415(3) | 0.820(1) |
| Sn(2) | 0.772(1) | 0.1910(3) | 0.682(1) |
| Sn(3) | 0.509(1) | 0.2415(4) | 0.5633(1) |
| P(1) | 0.406(1) | 0.165(1) | 0.292(2) |
| P(2) | 0.823(2) | 0.441(1) | 0.051(1) |
| P(3) | 0.534(1) | 0.142(1) | 0.827(2) |
| P(4) | 0.932(1) | 0.254(1) | 0.937(1) |
| O(1) | 0.745(4) | 0.420(2) | 0.914(3) |
| O(2) | 0.867(3) | 0.305(2) | 0.848(5) |
| O(3) | 0.903(4) | 0.247(2) | 0.597(3) |
| O(4) | 0.403(4) | 0.209(2) | 0.413(4) |
| O(5) | 0.476(4) | 0.184(2) | 0.713(4) |
| O(6) | 0.491(4) | 0.080(1) | 0.852(6) |
| O(7) | 0.558(4) | 0.185(2) | 0.957(4) |
| O(8) | 0.796(5) | -0.003(1) | 0.612(5) |
| O(9) | 0.521(2) | 0.123(1) | 0.303(6) |
| O(10) | 0.292(3) | 0.133(2) | 0.263(5) |
| O(11) | 0.062(2) | 0.258(3) | 0.474(5) |
| O(12) | 0.931(4) | 0.455(3) | -0.032(5) |
| O(13 ) | -0.128(5) | 0.298(2) | 0.361(4) |
| O(14) | 0.830(5) | 0.391(1) | 0.166(4) |
| O(15) | 0.656(3) | 0.188(2) | 0.520(3) |
| O(16) | 0.395(3) | 0.208(2) | 0.167(4) |
| O(17) | 0.664(2) | 0.140(2) | 0.789(5) |
| O(18) | 0.652(3) | 0.259(1) | 0.725(4) |
| O(19) | 0.756(5) | 0.364(3) | 0.648(4) |
| O(20) | 0.677(4) | -0.021(2) | 0.200(5) |
| O(21) | 0.157(5) | 0.115(3) | 0.046(5) |
| C(1a) | 0.022(2) | -0.036(4) | -0.024(3) |
| C(1b) | 0.862(3) | 0.031(4) | 0.935(4) |
| N(1a) | -0.042(4) | 0.487(3) | 0.669(3) |
| N(1b) | 0.777(3) | -0.001(3) | 0.024(5) |
| C(2a) | 0.162(8) | 0.137(1) | 0.544(2) |
| C(2b) | 0.178(9) | 0.194(1) | 0.632(2) |
| N(2a) | 0.183(7) | 0.088(1) | 0.655(3) |
| N(2b) | 0.196(7) | 0.173(1) | 0.781(2) |
| C(3) | 0.503(10) | -0.007(1) | 0.578(1) |
| N(3) | 0.506(7) | 0.056(1) | 0.634(5) |

**Table 3 : Selected bonds lengths (Å) for MIL-76.**

| Bond | Å | Bond | Å |
| --- | --- | --- | --- |
| Sn(1)-O(1) | 2.01(4) | Sn(1)-O(2) | 2.05(4) |
| Sn(1)-O(9) | 2.11(2) | Sn(1)-O(15) | 2.11(3) |
| Sn(1)-O(18) | 2.09(3) | Sn(1)-O(19) | 1.89(4) |
| Sn(2)-O(3) | 2.13(5) | Sn(2)-O(13) | 1.95(4) |
| Sn(2)-O(14) | 1.95(5) | Sn(2)-O(15) | 1.92(3) |
| Sn(2)-O(17) | 2.01(4) | Sn(2)-O(18) | 2.08(3) |
| Sn(3)-O(4) | 1.90(4) | Sn(3)-O(5) | 1.96(4) |
| Sn(3)-O(7) | 2.02(4) | Sn(3)-O(15) | 2.09(4) |
| Sn(3)-O(16) | 2.03(4) | Sn(3)-O(18) | 2.14(4) |
|  |  |  |  |
| P(1)-O(4) | 1.52(4) | P(1)-O(9) | 1.58(3) |
| P(1)-O(10) | 1.45(4) | P(1)-O(16) | 1.52(4) |
| P(2)-O(1) | 1.57(4) | P(2)-O(8) | 1.52(4) |
| P(2)-O(10) | 1.53(3) | P(2)-O(14) | 1.55(4) |
| P(3)-O(5) | 1.52(4) | P(3)-O(6) | 1.58(3) |
| P(3)-O(7) | 1.45(4) | P(3)-O(17) | 1.52(3) |
| P(4)-O(2) | 1.58(4) | P(4)-O(3) | 1.58(3) |
| P(4)-O(11) | 1.49(4) | P(4)-O(13) | 1.50(4) |
|  |  |  |  |
| N(1a)-C(1a) | 1.51(5) | C(1a)-C(1b) | 1.49(5) |
| C(1b)-N(1b) | 1.51(7) |  |  |
| N(2a)-C(2a) | 1.52(3) | C(2a)-C(2b) | 1.53(2) |
| C(2b)-N(2b) | 1.49(3) |  |  |
| N(3)-C(13) | 1.50(4) | C(3)-C(3) | 1.51(2) |
|  |  |  |  |

**TGA of MIL-76** (under O2 atmosphere at 5°C/min):

**References**

(1) Rodriguez-Carvajal, J. *In "Collected Abstracts of Powder Diffraction Meeting", Toulouse, France* **1990**, 127.

(2) Roisnel, T.; Rodriguez-Carvajal, J. *In "Abstracts of the 7th European Powder Diffraction Conference", Barcelona, Spain* **2000**, 71.

(3) Young, R. A.; Wiles, D. B. *J. Appl. Crystallogr* **1982**, *15*, 430.
